# Supplementary material
Source: PubMed Central journal article supplement (PMC8847515)
Supplement: 12298_2021_1121_MOESM3_ESM.pdf [file 12298_2021_1121_MOESM3_ESM.pdf]

**Table S1** Summary of the assembly information of the 4 *Selenicereus* species.

| Species                |                         | <i>S. monacanthus</i> | <i>S. anthonyanus</i> | <i>S. grandiflorus</i> | <i>S. validus</i> |
|------------------------|-------------------------|-----------------------|-----------------------|------------------------|-------------------|
| GetOrganelle<br>v1.7.3 | Reads used for assembly | 4,689,701             | 120,589               | 8,907,053              | 5,422,905         |
|                        | Kmer-coverage           | 179.2                 | 179.7                 | 175.3                  | 177.2             |
|                        | Base-coverage           | 584.5                 | 586.0                 | 571.6                  | 577.7             |
| NOVOPlasty<br>v3.8.1   | Assembly results        | circular genome       | 13 scaffold(s)        | circular genome        | circular genome   |
|                        | Total contigs           |                       | 2                     |                        |                   |
|                        | Largest contig          |                       | 67,180 bp             |                        |                   |
|                        | Smallest contig         |                       | 39,643 bp             |                        |                   |
|                        | Merged contigs results  |                       | circular genome       |                        |                   |

**Table S2** List of plastid genomes used for phylogenetic analysis.

| Species                            | Tribe        | Subfamily     | NCBI Accession No. |
|------------------------------------|--------------|---------------|--------------------|
| <i>Mammillaria solisioides</i>     | Cacteeae     | Cactoideae    | MN518341.1         |
| <i>Mammillaria pectinifera</i>     | Cacteeae     | Cactoideae    | MN519716.1         |
| <i>Mammillaria crucigera</i>       | Cacteeae     | Cactoideae    | MN517613.1         |
| <i>Mammillaria huitzilopochtli</i> | Cacteeae     | Cactoideae    | MN517612.1         |
| <i>Mammillaria zephyranthoides</i> | Cacteeae     | Cactoideae    | MN517611.1         |
| <i>Mammillaria albiflora</i>       | Cacteeae     | Cactoideae    | MN517610.1         |
| <i>Mammillaria supertexta</i>      | Cacteeae     | Cactoideae    | MN508963.1         |
| <i>Carnegiea gigantea</i>          | Hylocereeae  | Cactoideae    | NC_027618.1        |
| <i>Lophocereus schottii</i>        | Hylocereeae  | Cactoideae    | NC_041727.1        |
| <i>Parodia magnifica</i>           | Notocacteeae | Cactoideae    | MT369936.1         |
| <i>Rhipsalis baccifera</i>         | Rhipsalideae | Cactoideae    | MT821847.1         |
| <i>Selenicereus monacanthus</i>    | Hylocereeae  | Cactoideae    | MW553055           |
| <i>Selenicereus grandiflorus</i>   | Hylocereeae  | Cactoideae    | MW553069           |
| <i>Selenicereus validus</i>        | Hylocereeae  | Cactoideae    | MW553070           |
| <i>Selenicereus anthonyanus</i>    | Hylocereeae  | Cactoideae    | MW553068           |
| <i>Pereskia sacharosa</i>          | Pereskieae   | Pereskioideae | MT369935.1         |
| <i>Opuntia quimilo</i>             | Opuntieae    | Opuntioideae  | MN114084.1         |

**Table S3** Statistics on simple sequence repeats (SSRs) in the 4 plastid genomes.

| Species               | SSR<br>nr. | SSR<br>type | SSR                                                                                                                 | Size | Start | End   |
|-----------------------|------------|-------------|---------------------------------------------------------------------------------------------------------------------|------|-------|-------|
| <i>S. monacanthus</i> | 1          | p1          | (T)10                                                                                                               | 10   | 126   | 135   |
| <i>S. monacanthus</i> | 2          | p1          | (T)12                                                                                                               | 12   | 2777  | 2788  |
| <i>S. monacanthus</i> | 3          | p1          | (T)14                                                                                                               | 14   | 3850  | 3863  |
| <i>S. monacanthus</i> | 4          | p1          | (T)11                                                                                                               | 11   | 5722  | 5732  |
| <i>S. monacanthus</i> | 5          | p2          | (AT)5                                                                                                               | 10   | 7024  | 7033  |
| <i>S. monacanthus</i> | 6          | p1          | (A)10                                                                                                               | 10   | 13649 | 13658 |
| <i>S. monacanthus</i> | 7          | p2          | (TA)9                                                                                                               | 18   | 16360 | 16377 |
| <i>S. monacanthus</i> | 8          | p2          | (TA)7                                                                                                               | 14   | 17960 | 17973 |
| <i>S. monacanthus</i> | 9          | p1          | (T)11                                                                                                               | 11   | 18614 | 18624 |
| <i>S. monacanthus</i> | 10         | p2          | (AT)6                                                                                                               | 12   | 22557 | 22568 |
| <i>S. monacanthus</i> | 11         | p1          | (A)10                                                                                                               | 10   | 30705 | 30714 |
| <i>S. monacanthus</i> | 12         | p1          | (T)10                                                                                                               | 10   | 31004 | 31013 |
| <i>S. monacanthus</i> | 13         | p1          | (A)13                                                                                                               | 13   | 32751 | 32763 |
| <i>S. monacanthus</i> | 14         | p1          | (A)11                                                                                                               | 11   | 32925 | 32935 |
| <i>S. monacanthus</i> | 15         | p1          | (A)10                                                                                                               | 10   | 33106 | 33115 |
| <i>S. monacanthus</i> | 16         | p1          | (T)11                                                                                                               | 11   | 37759 | 37769 |
| <i>S. monacanthus</i> | 17         | p1          | (A)10                                                                                                               | 10   | 38052 | 38061 |
| <i>S. monacanthus</i> | 18         | p5          | (AAAAG)3                                                                                                            | 15   | 41414 | 41428 |
| <i>S. monacanthus</i> | 19         | p1          | (A)17                                                                                                               | 17   | 42632 | 42648 |
| <i>S. monacanthus</i> | 20         | p3          | (AGG)4                                                                                                              | 12   | 43074 | 43085 |
| <i>S. monacanthus</i> | 21         | p1          | (T)11                                                                                                               | 11   | 45583 | 45593 |
| <i>S. monacanthus</i> | 22         | p1          | (A)10                                                                                                               | 10   | 48521 | 48530 |
| <i>S. monacanthus</i> | 23         | p2          | (AT)7                                                                                                               | 14   | 52018 | 52031 |
| <i>S. monacanthus</i> | 24         | p1          | (A)10                                                                                                               | 10   | 52564 | 52573 |
| <i>S. monacanthus</i> | 25         | p1          | (T)10                                                                                                               | 10   | 52711 | 52720 |
| <i>S. monacanthus</i> | 26         | p1          | (T)10                                                                                                               | 10   | 54274 | 54283 |
| <i>S. monacanthus</i> | 27         | p1          | (A)10                                                                                                               | 10   | 54706 | 54715 |
| <i>S. monacanthus</i> | 28         | p1          | (T)10                                                                                                               | 10   | 57867 | 57876 |
| <i>S. monacanthus</i> | 29         | p1          | (T)12                                                                                                               | 12   | 59499 | 59510 |
| <i>S. monacanthus</i> | 30         | p2          | (AT)6                                                                                                               | 12   | 59655 | 59666 |
| <i>S. monacanthus</i> | 31         | p6          | (AAATTC)3                                                                                                           | 18   | 60752 | 60769 |
| <i>S. monacanthus</i> | 32         | c           | (T)15atgaattttcaatc(A)10<br>(TTTC)3gcctttccttttatccgcatccccttcctttaa<br>tgtatatttttc(T)10gacaactctttcgatttctgtttatg | 39   | 63311 | 63349 |
| <i>S. monacanthus</i> | 33         | c           | c(A)10                                                                                                              | 105  | 64859 | 64963 |
| <i>S. monacanthus</i> | 34         | p1          | (T)10                                                                                                               | 10   | 65101 | 65110 |
| <i>S. monacanthus</i> | 35         | p1          | (T)10<br>(A)11caactttgctgacaattacttatttttagttttg                                                                    | 10   | 67053 | 67062 |
| <i>S. monacanthus</i> | 36         | c           | gtcagaagagtcctctgaatattctggtc(T)14                                                                                  | 94   | 68129 | 68222 |
| <i>S. monacanthus</i> | 37         | p1          | (A)10                                                                                                               | 10   | 71257 | 71266 |
| <i>S. monacanthus</i> | 38         | p2          | (TA)5                                                                                                               | 10   | 73021 | 73030 |

|                       |    |    |                                          |    |        |        |
|-----------------------|----|----|------------------------------------------|----|--------|--------|
| <i>S. monacanthus</i> | 39 | p1 | (A)10                                    | 10 | 73600  | 73609  |
| <i>S. monacanthus</i> | 40 | p1 | (T)10                                    | 10 | 75559  | 75568  |
| <i>S. monacanthus</i> | 41 | p1 | (A)10                                    | 10 | 78842  | 78851  |
| <i>S. monacanthus</i> | 42 | c  | (T)11agtttataattaacttttcaattttaagta(T)11 | 52 | 80492  | 80543  |
| <i>S. monacanthus</i> | 43 | p4 | (ATTT)3                                  | 12 | 90619  | 90630  |
| <i>S. monacanthus</i> | 44 | p1 | (A)10                                    | 10 | 92140  | 92149  |
| <i>S. monacanthus</i> | 45 | p4 | (ATTC)3                                  | 12 | 94026  | 94037  |
| <i>S. monacanthus</i> | 46 | p1 | (A)10                                    | 10 | 94139  | 94148  |
| <i>S. monacanthus</i> | 47 | p1 | (T)10                                    | 10 | 94993  | 95002  |
| <i>S. monacanthus</i> | 48 | p1 | (A)14                                    | 14 | 96620  | 96633  |
| <i>S. monacanthus</i> | 49 | p3 | (ATT)4                                   | 12 | 97521  | 97532  |
| <i>S. monacanthus</i> | 50 | p1 | (A)13                                    | 13 | 97812  | 97824  |
| <i>S. monacanthus</i> | 51 | p2 | (AT)6                                    | 12 | 99108  | 99119  |
| <i>S. monacanthus</i> | 52 | p4 | (CTAC)3                                  | 12 | 102204 | 102215 |
| <i>S. monacanthus</i> | 53 | c  | (A)11tacttaaattgaaaagttaattataaact(A)11  | 52 | 120680 | 120731 |
| <i>S. monacanthus</i> | 54 | p1 | (T)10                                    | 10 | 122372 | 122381 |
| <i>S. monacanthus</i> | 55 | p1 | (A)10                                    | 10 | 125655 | 125664 |
| <i>S. monacanthus</i> | 56 | p1 | (T)10                                    | 10 | 127614 | 127623 |
| <i>S. monacanthus</i> | 57 | p2 | (TA)5                                    | 10 | 128193 | 128202 |
| <i>S. monacanthus</i> | 58 | p1 | (T)10                                    | 10 | 129957 | 129966 |
|                       |    |    | (A)14gaccagaatattcagaggactcttctgaccaaac  |    |        |        |
| <i>S. monacanthus</i> | 59 | c  | aaaaactaaaaataagtaattgtcagcaaagttg(T)11  | 94 | 133001 | 133094 |
| <i>S. anthonyanus</i> | 1  | p1 | (T)10                                    | 10 | 126    | 135    |
| <i>S. anthonyanus</i> | 2  | p1 | (T)12                                    | 12 | 2892   | 2903   |
| <i>S. anthonyanus</i> | 3  | p1 | (T)11                                    | 11 | 5837   | 5847   |
| <i>S. anthonyanus</i> | 4  | p2 | (AT)5                                    | 10 | 7139   | 7148   |
| <i>S. anthonyanus</i> | 5  | p1 | (A)10                                    | 10 | 13764  | 13773  |
| <i>S. anthonyanus</i> | 6  | p4 | (TATG)3                                  | 12 | 14770  | 14781  |
| <i>S. anthonyanus</i> | 7  | p2 | (TA)6                                    | 12 | 16479  | 16490  |
| <i>S. anthonyanus</i> | 8  | p2 | (AT)6                                    | 12 | 18073  | 18084  |
| <i>S. anthonyanus</i> | 9  | p1 | (T)10                                    | 10 | 21611  | 21620  |
| <i>S. anthonyanus</i> | 10 | p2 | (AT)6                                    | 12 | 22667  | 22678  |
| <i>S. anthonyanus</i> | 11 | p1 | (T)11                                    | 11 | 32772  | 32782  |
| <i>S. anthonyanus</i> | 12 | p1 | (A)10                                    | 10 | 33149  | 33158  |
| <i>S. anthonyanus</i> | 13 | p1 | (A)10                                    | 10 | 38013  | 38022  |
| <i>S. anthonyanus</i> | 14 | p2 | (AT)5                                    | 10 | 41225  | 41234  |
| <i>S. anthonyanus</i> | 15 | p1 | (A)20                                    | 20 | 42465  | 42484  |
|                       |    |    | (AGG)4cagatgataagaataaagacccttttgcattg   |    |        |        |
| <i>S. anthonyanus</i> | 16 | c  | caaatgcaattgt(A)10                       | 69 | 43111  | 43179  |
| <i>S. anthonyanus</i> | 17 | p1 | (T)11                                    | 11 | 45799  | 45809  |
| <i>S. anthonyanus</i> | 18 | p1 | (A)12                                    | 12 | 48729  | 48740  |
| <i>S. anthonyanus</i> | 19 | p1 | (A)10                                    | 10 | 51198  | 51207  |
| <i>S. anthonyanus</i> | 20 | p2 | (AT)7                                    | 14 | 52227  | 52240  |
| <i>S. anthonyanus</i> | 21 | p1 | (T)12                                    | 12 | 54453  | 54464  |

|                        |    |    |                                                |     |        |        |
|------------------------|----|----|------------------------------------------------|-----|--------|--------|
| <i>S. anthonyanus</i>  | 22 | p3 | (TTA)4                                         | 12  | 59684  | 59695  |
| <i>S. anthonyanus</i>  | 23 | p2 | (AT)6                                          | 12  | 59830  | 59841  |
| <i>S. anthonyanus</i>  | 24 | p6 | (ATTCAA)4                                      | 24  | 60923  | 60946  |
| <i>S. anthonyanus</i>  | 25 | p1 | (T)10                                          | 10  | 62392  | 62401  |
| <i>S. anthonyanus</i>  | 26 | p1 | (T)11                                          | 11  | 63478  | 63488  |
|                        |    |    | (TTTC)3gcctttccttttatccgcatccccttcctttaatgt    |     |        |        |
| <i>S. anthonyanus</i>  | 27 | c  | atatttttc(T)10gacaactctttcgatttctgtttatgc(A)10 | 105 | 65021  | 65125  |
| <i>S. anthonyanus</i>  | 28 | p1 | (T)10                                          | 10  | 67174  | 67183  |
|                        |    |    | (A)11caactttgctgacaattactatttttagttttgtttggt   |     |        |        |
| <i>S. anthonyanus</i>  | 29 | c  | cagaagagtcctctgaatattctggtc(T)12               | 92  | 68256  | 68347  |
| <i>S. anthonyanus</i>  | 30 | p1 | (A)12                                          | 12  | 71379  | 71390  |
| <i>S. anthonyanus</i>  | 31 | p1 | (T)11                                          | 11  | 72148  | 72158  |
| <i>S. anthonyanus</i>  | 32 | p2 | (TA)5                                          | 10  | 73145  | 73154  |
| <i>S. anthonyanus</i>  | 33 | p1 | (A)10                                          | 10  | 73725  | 73734  |
| <i>S. anthonyanus</i>  | 34 | p5 | (AATGA)3                                       | 15  | 76490  | 76504  |
| <i>S. anthonyanus</i>  | 35 | p1 | (A)10                                          | 10  | 78966  | 78975  |
| <i>S. anthonyanus</i>  | 36 | c  | (T)11agtttataattaacttttcaattttaagta(T)11       | 52  | 80616  | 80667  |
| <i>S. anthonyanus</i>  | 37 | p4 | (ATTT)3                                        | 12  | 90746  | 90757  |
| <i>S. anthonyanus</i>  | 38 | p1 | (A)10                                          | 10  | 92279  | 92288  |
| <i>S. anthonyanus</i>  | 39 | p4 | (AAAG)3                                        | 12  | 92790  | 92801  |
| <i>S. anthonyanus</i>  | 40 | p4 | (ATTC)4                                        | 16  | 94195  | 94210  |
| <i>S. anthonyanus</i>  | 41 | p1 | (T)10                                          | 10  | 95164  | 95173  |
| <i>S. anthonyanus</i>  | 42 | p1 | (G)10                                          | 10  | 95777  | 95786  |
| <i>S. anthonyanus</i>  | 43 | c  | (T)10ctagatagttttcctttcatttcattaaat(A)10       | 50  | 96646  | 96695  |
| <i>S. anthonyanus</i>  | 44 | p3 | (ATT)4                                         | 12  | 97583  | 97594  |
| <i>S. anthonyanus</i>  | 45 | p1 | (A)12                                          | 12  | 97874  | 97885  |
| <i>S. anthonyanus</i>  | 46 | p2 | (AT)6                                          | 12  | 99423  | 99434  |
| <i>S. anthonyanus</i>  | 47 | p4 | (CTAC)3                                        | 12  | 102523 | 102534 |
| <i>S. anthonyanus</i>  | 48 | c  | (A)11tacttaaaattgaaaagtaattataaaact(A)11       | 52  | 120854 | 120905 |
| <i>S. anthonyanus</i>  | 49 | p1 | (T)10                                          | 10  | 122546 | 122555 |
| <i>S. anthonyanus</i>  | 50 | p5 | (AT TTC)3                                      | 15  | 125014 | 125028 |
| <i>S. anthonyanus</i>  | 51 | p1 | (T)10                                          | 10  | 127787 | 127796 |
| <i>S. anthonyanus</i>  | 52 | p2 | (TA)5                                          | 10  | 128367 | 128376 |
| <i>S. anthonyanus</i>  | 53 | p1 | (A)11                                          | 11  | 129363 | 129373 |
| <i>S. anthonyanus</i>  | 54 | p1 | (T)12                                          | 12  | 130131 | 130142 |
|                        |    |    | (A)12gaccagaatattcagaggactcttctgaccaaacia      |     |        |        |
| <i>S. anthonyanus</i>  | 55 | c  | aaactaaaaataagtaattgtcagcaaagttg(T)11          | 92  | 133174 | 133265 |
| <i>S. grandiflorus</i> | 1  | p1 | (T)13                                          | 13  | 2888   | 2900   |
| <i>S. grandiflorus</i> | 2  | p4 | (ATTT)3                                        | 12  | 3767   | 3778   |
| <i>S. grandiflorus</i> | 3  | p1 | (T)11                                          | 11  | 5833   | 5843   |
| <i>S. grandiflorus</i> | 4  | p2 | (AT)5                                          | 10  | 7135   | 7144   |
| <i>S. grandiflorus</i> | 5  | p1 | (A)10                                          | 10  | 13760  | 13769  |
| <i>S. grandiflorus</i> | 6  | p2 | (TA)5                                          | 10  | 16472  | 16481  |
| <i>S. grandiflorus</i> | 7  | p2 | (AT)9                                          | 18  | 18064  | 18081  |

|                        |    |    |                                                                                                                                     |     |        |        |
|------------------------|----|----|-------------------------------------------------------------------------------------------------------------------------------------|-----|--------|--------|
| <i>S. grandiflorus</i> | 8  | p2 | (AT)8                                                                                                                               | 16  | 22662  | 22677  |
| <i>S. grandiflorus</i> | 9  | p1 | (T)10                                                                                                                               | 10  | 32848  | 32857  |
| <i>S. grandiflorus</i> | 10 | p1 | (A)10                                                                                                                               | 10  | 33063  | 33072  |
| <i>S. grandiflorus</i> | 11 | p1 | (A)11                                                                                                                               | 11  | 33243  | 33253  |
| <i>S. grandiflorus</i> | 12 | p1 | (A)10                                                                                                                               | 10  | 33820  | 33829  |
| <i>S. grandiflorus</i> | 13 | p2 | (AT)7                                                                                                                               | 14  | 34974  | 34987  |
| <i>S. grandiflorus</i> | 14 | p1 | (A)10                                                                                                                               | 10  | 38072  | 38081  |
| <i>S. grandiflorus</i> | 15 | c  | (AT)5agagaagatcctatTTTTatttgatttgatttggga<br>ttgaatcaaaata(AT)6                                                                     | 76  | 39980  | 40055  |
| <i>S. grandiflorus</i> | 16 | p1 | (T)11                                                                                                                               | 11  | 46457  | 46467  |
| <i>S. grandiflorus</i> | 17 | p1 | (T)12                                                                                                                               | 12  | 49347  | 49358  |
| <i>S. grandiflorus</i> | 18 | c  | (AT)5gaaaaaccgctcgtaaattcaaaaatactttcggga<br>atgctcagtaggaagggggcatgccactctattttatg(A)10                                            | 95  | 51777  | 51871  |
| <i>S. grandiflorus</i> | 19 | p2 | (AT)6                                                                                                                               | 12  | 52891  | 52902  |
| <i>S. grandiflorus</i> | 20 | p1 | (A)11                                                                                                                               | 11  | 55542  | 55552  |
| <i>S. grandiflorus</i> | 21 | p1 | (T)10                                                                                                                               | 10  | 58704  | 58713  |
| <i>S. grandiflorus</i> | 22 | p3 | (TTA)4                                                                                                                              | 12  | 60305  | 60316  |
| <i>S. grandiflorus</i> | 23 | p2 | (AT)7                                                                                                                               | 14  | 60451  | 60464  |
| <i>S. grandiflorus</i> | 24 | p6 | (ATTCAA)3                                                                                                                           | 18  | 61546  | 61563  |
| <i>S. grandiflorus</i> | 25 | p1 | (T)11                                                                                                                               | 11  | 64112  | 64122  |
| <i>S. grandiflorus</i> | 26 | c  | (TTTC)3gccttcttttatccgcaccccttctttaatgtat<br>attttc(T)11acaactcttgcatttctgtttatgc(A)10<br>(A)11caacttgcgacaattactatttttagttttggttgc | 105 | 65655  | 65759  |
| <i>S. grandiflorus</i> | 27 | c  | gaagagtcctctgaatattctggtc(T)12                                                                                                      | 92  | 68896  | 68987  |
| <i>S. grandiflorus</i> | 28 | p1 | (T)11                                                                                                                               | 11  | 72788  | 72798  |
| <i>S. grandiflorus</i> | 29 | p2 | (TA)5                                                                                                                               | 10  | 73785  | 73794  |
| <i>S. grandiflorus</i> | 30 | p1 | (A)10                                                                                                                               | 10  | 74248  | 74257  |
| <i>S. grandiflorus</i> | 31 | p1 | (A)10                                                                                                                               | 10  | 79488  | 79497  |
| <i>S. grandiflorus</i> | 32 | c  | (T)12agtttctaattaactttcaattttaagta(T)11                                                                                             | 53  | 81138  | 81190  |
| <i>S. grandiflorus</i> | 33 | p4 | (ATTT)3                                                                                                                             | 12  | 91381  | 91392  |
| <i>S. grandiflorus</i> | 34 | p1 | (A)10                                                                                                                               | 10  | 92447  | 92456  |
| <i>S. grandiflorus</i> | 35 | p1 | (A)10                                                                                                                               | 10  | 92902  | 92911  |
| <i>S. grandiflorus</i> | 36 | p4 | (AAAG)3                                                                                                                             | 12  | 93413  | 93424  |
| <i>S. grandiflorus</i> | 37 | p4 | (ATTC)3                                                                                                                             | 12  | 94818  | 94829  |
| <i>S. grandiflorus</i> | 38 | p1 | (T)10                                                                                                                               | 10  | 95785  | 95794  |
| <i>S. grandiflorus</i> | 39 | p1 | (G)15                                                                                                                               | 15  | 96398  | 96412  |
| <i>S. grandiflorus</i> | 40 | p1 | (A)12                                                                                                                               | 12  | 97418  | 97429  |
| <i>S. grandiflorus</i> | 41 | p3 | (ATT)5                                                                                                                              | 15  | 98318  | 98332  |
| <i>S. grandiflorus</i> | 42 | p1 | (A)10                                                                                                                               | 10  | 98609  | 98618  |
| <i>S. grandiflorus</i> | 43 | p1 | (A)10                                                                                                                               | 10  | 99794  | 99803  |
| <i>S. grandiflorus</i> | 44 | p2 | (AT)9                                                                                                                               | 18  | 100164 | 100181 |
| <i>S. grandiflorus</i> | 45 | p4 | (CTAC)3                                                                                                                             | 12  | 103265 | 103276 |
| <i>S. grandiflorus</i> | 46 | p2 | (AT)7                                                                                                                               | 14  | 108316 | 108329 |
| <i>S. grandiflorus</i> | 47 | c  | (A)11tacttaaattgaaaagttaattagaaact(A)12                                                                                             | 53  | 121861 | 121913 |

|                        |    |    |                                                                                                                         |     |        |        |
|------------------------|----|----|-------------------------------------------------------------------------------------------------------------------------|-----|--------|--------|
| <i>S. grandiflorus</i> | 48 | p1 | (T)10                                                                                                                   | 10  | 123554 | 123563 |
| <i>S. grandiflorus</i> | 49 | p1 | (T)10                                                                                                                   | 10  | 128794 | 128803 |
| <i>S. grandiflorus</i> | 50 | p2 | (TA)5                                                                                                                   | 10  | 129257 | 129266 |
| <i>S. grandiflorus</i> | 51 | p1 | (A)11                                                                                                                   | 11  | 130253 | 130263 |
| <i>S. grandiflorus</i> | 52 | c  | (A)12gaccagaatattcagaggactcttctgaccaaacaaa<br>actaaaaataagtaattgtcagcaaagtg(T)11                                        | 92  | 134064 | 134155 |
| <i>S. validus</i>      | 1  | p1 | (T)10                                                                                                                   | 10  | 123    | 132    |
| <i>S. validus</i>      | 2  | p1 | (T)12                                                                                                                   | 12  | 2888   | 2899   |
| <i>S. validus</i>      | 3  | p1 | (T)11                                                                                                                   | 11  | 5833   | 5843   |
| <i>S. validus</i>      | 4  | p2 | (AT)5                                                                                                                   | 10  | 7135   | 7144   |
| <i>S. validus</i>      | 5  | p1 | (A)10                                                                                                                   | 10  | 13759  | 13768  |
| <i>S. validus</i>      | 6  | p2 | (TA)5                                                                                                                   | 10  | 16470  | 16479  |
| <i>S. validus</i>      | 7  | p2 | (AT)9                                                                                                                   | 18  | 18063  | 18080  |
| <i>S. validus</i>      | 8  | p2 | (AT)7                                                                                                                   | 14  | 22663  | 22676  |
| <i>S. validus</i>      | 9  | p1 | (T)13                                                                                                                   | 13  | 32847  | 32859  |
| <i>S. validus</i>      | 10 | p1 | (A)10                                                                                                                   | 10  | 33045  | 33054  |
| <i>S. validus</i>      | 11 | p1 | (A)10                                                                                                                   | 10  | 33225  | 33234  |
| <i>S. validus</i>      | 12 | p1 | (A)11                                                                                                                   | 11  | 33803  | 33813  |
| <i>S. validus</i>      | 13 | p2 | (AT)7                                                                                                                   | 14  | 34958  | 34971  |
| <i>S. validus</i>      | 14 | p1 | (A)10                                                                                                                   | 10  | 38026  | 38035  |
| <i>S. validus</i>      | 15 | c  | (AT)5agagaagatcctatttaaatttgattttgttgatt<br>gaatcagaata(AT)6agaaaaatcctatttaaatttgatttga<br>ttttgttgattgaatcaaaata(AT)6 | 140 | 39934  | 40073  |
| <i>S. validus</i>      | 16 | p5 | (TATTC)4                                                                                                                | 20  | 40623  | 40642  |
| <i>S. validus</i>      | 17 | p1 | (T)11                                                                                                                   | 11  | 46479  | 46489  |
| <i>S. validus</i>      | 18 | p1 | (T)11                                                                                                                   | 11  | 49370  | 49380  |
| <i>S. validus</i>      | 19 | p1 | (T)10                                                                                                                   | 10  | 51043  | 51052  |
| <i>S. validus</i>      | 20 | p2 | (TA)6                                                                                                                   | 12  | 51799  | 51810  |
| <i>S. validus</i>      | 21 | p2 | (AT)6                                                                                                                   | 12  | 52921  | 52932  |
| <i>S. validus</i>      | 22 | p1 | (A)10                                                                                                                   | 10  | 55572  | 55581  |
| <i>S. validus</i>      | 23 | p1 | (T)11                                                                                                                   | 11  | 58733  | 58743  |
| <i>S. validus</i>      | 24 | p3 | (TTA)4                                                                                                                  | 12  | 60336  | 60347  |
| <i>S. validus</i>      | 25 | p2 | (AT)7                                                                                                                   | 14  | 60482  | 60495  |
| <i>S. validus</i>      | 26 | p6 | (AAATTA)3                                                                                                               | 18  | 61581  | 61598  |
| <i>S. validus</i>      | 27 | p1 | (T)11                                                                                                                   | 11  | 64149  | 64159  |
| <i>S. validus</i>      | 28 | c  | (TTTC)3gcctttccttttatccgcacccctttctttaat<br>gtatattttc(T)10                                                             | 67  | 65692  | 65758  |
| <i>S. validus</i>      | 29 | p1 | (A)11                                                                                                                   | 11  | 68934  | 68944  |
| <i>S. validus</i>      | 30 | p1 | (T)11                                                                                                                   | 11  | 72823  | 72833  |
| <i>S. validus</i>      | 31 | p2 | (TA)5                                                                                                                   | 10  | 73820  | 73829  |
| <i>S. validus</i>      | 32 | p1 | (A)10                                                                                                                   | 10  | 74283  | 74292  |
| <i>S. validus</i>      | 33 | p1 | (A)10                                                                                                                   | 10  | 79522  | 79531  |
| <i>S. validus</i>      | 34 | c  | (T)12agtttctaattaacttttcaattttaagta(T)11                                                                                | 53  | 81172  | 81224  |
| <i>S. validus</i>      | 35 | p4 | (ATTT)3                                                                                                                 | 12  | 91515  | 91526  |

|                   |    |    |                                         |    |        |        |
|-------------------|----|----|-----------------------------------------|----|--------|--------|
| <i>S. validus</i> | 36 | p1 | (A)10                                   | 10 | 92581  | 92590  |
| <i>S. validus</i> | 37 | p1 | (A)10                                   | 10 | 93036  | 93045  |
| <i>S. validus</i> | 38 | p4 | (AAAG)3                                 | 12 | 93547  | 93558  |
| <i>S. validus</i> | 39 | p4 | (ATTC)3                                 | 12 | 94952  | 94963  |
| <i>S. validus</i> | 40 | p1 | (A)10                                   | 10 | 95065  | 95074  |
| <i>S. validus</i> | 41 | p1 | (G)14                                   | 14 | 96531  | 96544  |
| <i>S. validus</i> | 42 | p1 | (A)12                                   | 12 | 97553  | 97564  |
| <i>S. validus</i> | 43 | p3 | (ATT)5                                  | 15 | 98454  | 98468  |
| <i>S. validus</i> | 44 | p1 | (A)10                                   | 10 | 98745  | 98754  |
| <i>S. validus</i> | 45 | p1 | (T)10                                   | 10 | 99645  | 99654  |
| <i>S. validus</i> | 46 | p1 | (A)11                                   | 11 | 99931  | 99941  |
| <i>S. validus</i> | 47 | p2 | (AT)6                                   | 12 | 100302 | 100313 |
| <i>S. validus</i> | 48 | p4 | (CTAC)3                                 | 12 | 103404 | 103415 |
| <i>S. validus</i> | 49 | p2 | (AT)7                                   | 14 | 108455 | 108468 |
| <i>S. validus</i> | 50 | c  | (A)11tacttaaattgaaaagttaattagaaact(A)12 | 53 | 122104 | 122156 |
| <i>S. validus</i> | 51 | p1 | (T)10                                   | 10 | 123797 | 123806 |
| <i>S. validus</i> | 52 | p1 | (T)10                                   | 10 | 129036 | 129045 |
| <i>S. validus</i> | 53 | p2 | (TA)5                                   | 10 | 129499 | 129508 |
| <i>S. validus</i> | 54 | p1 | (A)11                                   | 11 | 130495 | 130505 |
| <i>S. validus</i> | 55 | p1 | (T)11                                   | 11 | 134384 | 134394 |

Note. The individual repeat in the compound repeats were counted separately.



**Table S5** Percentages of variable sites in 67 orthologous genes among the 4 *Selenicereus* species.

| No | Gene         | Variable sites | Aligned length (bp) | Mutation rates (%) |
|----|--------------|----------------|---------------------|--------------------|
| 1  | <i>rpl32</i> | 20             | 162                 | 12.35              |
| 2  | <i>accD</i>  | 398            | 3960                | 10.05              |
| 3  | <i>clpP</i>  | 46             | 618                 | 7.44               |
| 4  | <i>rpl22</i> | 27             | 540                 | 5.00               |
| 5  | <i>ycf1</i>  | 217            | 5574                | 3.89               |
| 6  | <i>rpl36</i> | 4              | 111                 | 3.60               |
| 7  | <i>rps15</i> | 7              | 276                 | 2.54               |
| 8  | <i>ndhB</i>  | 15             | 711                 | 2.11               |
| 9  | <i>rps2</i>  | 13             | 729                 | 1.78               |
| 10 | <i>rpl16</i> | 6              | 405                 | 1.48               |
| 11 | <i>rps19</i> | 6              | 405                 | 1.48               |
| 12 | <i>rpl2</i>  | 12             | 840                 | 1.43               |
| 13 | <i>rpoA</i>  | 13             | 1005                | 1.29               |
| 14 | <i>rps3</i>  | 9              | 699                 | 1.29               |
| 15 | <i>infA</i>  | 3              | 243                 | 1.23               |
| 16 | <i>rpl20</i> | 5              | 411                 | 1.22               |
| 17 | <i>rps18</i> | 5              | 411                 | 1.22               |
| 18 | <i>rps11</i> | 5              | 414                 | 1.21               |
| 19 | <i>petL</i>  | 1              | 93                  | 1.08               |
| 20 | <i>rps7</i>  | 5              | 468                 | 1.07               |
| 21 | <i>cemA</i>  | 7              | 687                 | 1.02               |
| 22 | <i>psbT</i>  | 1              | 105                 | 0.95               |
| 23 | <i>ccsA</i>  | 9              | 978                 | 0.92               |
| 24 | <i>psbJ</i>  | 1              | 120                 | 0.83               |
| 25 | <i>rpl14</i> | 3              | 363                 | 0.83               |
| 26 | <i>rps12</i> | 3              | 369                 | 0.81               |
| 27 | <i>ycf2</i>  | 50             | 6633                | 0.75               |
| 28 | <i>rps8</i>  | 3              | 408                 | 0.74               |
| 29 | <i>rpoC2</i> | 28             | 4038                | 0.69               |
| 30 | <i>rps14</i> | 2              | 300                 | 0.67               |
| 31 | <i>rpoB</i>  | 20             | 3213                | 0.62               |
| 32 | <i>petB</i>  | 4              | 645                 | 0.62               |
| 33 | <i>ycf4</i>  | 3              | 546                 | 0.55               |
| 34 | <i>ycf15</i> | 1              | 186                 | 0.54               |
| 35 | <i>atpB</i>  | 8              | 1494                | 0.54               |
| 36 | <i>rpl33</i> | 1              | 189                 | 0.53               |
| 37 | <i>petA</i>  | 5              | 960                 | 0.52               |
| 38 | <i>atpH</i>  | 1              | 243                 | 0.41               |
| 39 | <i>rps4</i>  | 2              | 603                 | 0.33               |
| 40 | <i>rbcL</i>  | 4              | 1443                | 0.28               |

|    |              |   |      |      |
|----|--------------|---|------|------|
| 41 | <i>psaA</i>  | 6 | 2250 | 0.27 |
| 42 | <i>psbB</i>  | 4 | 1524 | 0.26 |
| 43 | <i>rpoC1</i> | 5 | 2037 | 0.25 |
| 44 | <i>yef3</i>  | 1 | 504  | 0.20 |
| 45 | <i>psaB</i>  | 4 | 2202 | 0.18 |
| 46 | <i>atpF</i>  | 1 | 563  | 0.18 |
| 47 | <i>psbD</i>  | 1 | 1059 | 0.09 |
| 48 | <i>psbC</i>  | 1 | 1419 | 0.07 |
| 49 | <i>atpA</i>  | 0 | 0    | 0    |
| 50 | <i>matk</i>  | 0 | 0    | 0    |
| 51 | <i>petD</i>  | 0 | 0    | 0    |
| 52 | <i>petG</i>  | 0 | 0    | 0    |
| 53 | <i>petN</i>  | 0 | 0    | 0    |
| 54 | <i>psaC</i>  | 0 | 0    | 0    |
| 55 | <i>psaI</i>  | 0 | 0    | 0    |
| 56 | <i>psaJ</i>  | 0 | 0    | 0    |
| 57 | <i>psbA</i>  | 0 | 0    | 0    |
| 58 | <i>psbE</i>  | 0 | 0    | 0    |
| 59 | <i>psbF</i>  | 0 | 0    | 0    |
| 60 | <i>psbH</i>  | 0 | 0    | 0    |
| 61 | <i>psbI</i>  | 0 | 0    | 0    |
| 62 | <i>psbK</i>  | 0 | 0    | 0    |
| 63 | <i>psbM</i>  | 0 | 0    | 0    |
| 64 | <i>psbN</i>  | 0 | 0    | 0    |
| 65 | <i>psbT</i>  | 0 | 0    | 0    |
| 66 | <i>psbZ</i>  | 0 | 0    | 0    |
| 67 | <i>rps16</i> | 0 | 0    | 0    |

---

**Table S6** Summary of sequencing data quality.

| Species            | <i>S. monacanthus</i> | <i>S. anthonyanus</i> | <i>S. grandiflorus</i> | <i>S. validus</i> |
|--------------------|-----------------------|-----------------------|------------------------|-------------------|
| Raw Reads          | 22,460,608            | 20,130,469            | 22,841,707             | 22,696,845        |
| Clean Reads        | 22,261,788            | 19,890,551            | 22,691,950             | 22,482,739        |
| Raw Base (G)       | 6.74                  | 6.04                  | 6.85                   | 6.81              |
| Clean Base (G)     | 6.68                  | 5.97                  | 6.81                   | 6.74              |
| Effective Rate (%) | 99.11                 | 98.81                 | 99.34                  | 99.06             |
| Error Rate (%)     | 0.03                  | 0.03                  | 0.03                   | 0.03              |
| Q20 (%)            | 97.19                 | 97.31                 | 96.56                  | 97.25             |
| Q30 (%)            | 92.15                 | 92.51                 | 90.38                  | 92.31             |
| GC Content (%)     | 38.73                 | 38.84                 | 39                     | 39.09             |
